# Supplementary material for: Au–Au chemical bonding induced by UV irradiation of dinuclear gold(i) complexes: a computational study with experimental evidence
Source: Royal Society of Chemistry journal article supplement (doi:10.1039/c4cp03990d), 2014-01-01

## Supplementary Information

### **Chemical Au-Au bonding of dinuclear Gold(I) complexes induced by UV irradiation. A computational study with experimental evidence.**

**Authors:** Camille Latouche<sup>§&</sup>, Yan-Ru Lin<sup>§</sup>, Yeny Tobon<sup>\*\*</sup>, Eric Furet<sup>§</sup>, Jean-Yves Saillard<sup>§\*</sup>, Chen-Wei Liu<sup>§\*</sup>, Abdou Boucekkine<sup>§\*</sup>

*§Institut des Sciences Chimiques de Rennes, UMR 6226 CNRS-Université de Rennes 1, Campus de Beaulieu, 35042 Rennes cedex, France.*

*&Scuola Normale Superiore, Piazza dei Cavalieri 7, I-56126 Pisa, Italy*

*#Laboratoire de Spectrochimie Infrarouge et Raman, UMR 8516 CNRS-Université de Lille 1, Sciences et Technologies, 59655 Villeneuve d'Ascq Cedex, France*

*§Department of Chemistry, National Dong Hwa University, Hualien, Taiwan 97401, Republic of China.*

## Computed optimized geometries

Complex 1, T1 (triplet excited state)

PBE1PBE/lanl2dzp/ (C<sub>i</sub>)

E = -1560.735701 au

|    |          |          |          |
|----|----------|----------|----------|
| Au | 0.16006  | -1.33631 | -0.13445 |
| Se | 2.15336  | 2.22647  | -0.24674 |
| Se | 2.60684  | -1.55139 | -0.6399  |
| P  | 3.29922  | 0.37064  | 0.28677  |
| C  | 3.47113  | 0.19807  | 2.12468  |
| H  | 4.07847  | -0.70238 | 2.29462  |
| H  | 4.05442  | 1.06817  | 2.46197  |
| C  | 2.15185  | 0.10194  | 2.90183  |
| H  | 1.55933  | 1.00832  | 2.72212  |
| H  | 1.56379  | -0.744   | 2.52129  |
| C  | 2.41944  | -0.06694 | 4.3794   |
| C  | 2.57045  | 1.05211  | 5.21227  |
| H  | 2.45326  | 2.05335  | 4.79187  |
| C  | 2.55523  | -1.34516 | 4.94191  |
| H  | 2.42663  | -2.22588 | 4.30892  |
| C  | 2.83859  | -1.50309 | 6.30246  |
| H  | 2.93393  | -2.50419 | 6.72413  |
| C  | 2.85415  | 0.89993  | 6.57343  |
| H  | 2.9617   | 1.78068  | 7.20732  |
| C  | 2.99133  | -0.37979 | 7.12318  |
| H  | 3.20817  | -0.50095 | 8.1848   |
| C  | 5.0125   | 0.67256  | -0.34659 |
| H  | 4.90657  | 0.80302  | -1.43193 |
| H  | 5.33755  | 1.63922  | 0.0641   |
| C  | 6.03696  | -0.43074 | -0.02966 |
| H  | 6.15927  | -0.52496 | 1.05756  |
| H  | 5.65785  | -1.39315 | -0.39894 |
| C  | 7.37215  | -0.11984 | -0.66737 |
| C  | 7.612    | -0.45096 | -2.00997 |
| H  | 6.83859  | -0.96696 | -2.58276 |
| C  | 8.38146  | 0.53401  | 0.05404  |
| H  | 8.2141   | 0.79208  | 1.10173  |
| C  | 9.60294  | 0.85166  | -0.55028 |
| H  | 10.37867 | 1.35607  | 0.02658  |
| C  | 8.83067  | -0.13564 | -2.61821 |
| H  | 9.00209  | -0.40479 | -3.66081 |
| C  | 9.83103  | 0.51867  | -1.88966 |
| H  | 10.78302 | 0.76292  | -2.36145 |
| Au | -0.16006 | 1.33631  | 0.13445  |
| Se | -2.15336 | -2.22647 | 0.24674  |

|    |           |          |          |
|----|-----------|----------|----------|
| Se | -2.60684  | 1.55139  | 0.6399   |
| P  | -3.29922  | -0.37064 | -0.28677 |
| C  | -3.47113  | -0.19807 | -2.12468 |
| H  | -4.07847  | 0.70238  | -2.29462 |
| H  | -4.05442  | -1.06817 | -2.46197 |
| C  | -2.15185  | -0.10194 | -2.90183 |
| H  | -1.55933  | -1.00832 | -2.72212 |
| H  | -1.56379  | 0.744    | -2.52129 |
| C  | -2.41944  | 0.06694  | -4.3794  |
| C  | -2.57045  | -1.05211 | -5.21227 |
| H  | -2.45326  | -2.05335 | -4.79187 |
| C  | -2.55523  | 1.34516  | -4.94191 |
| H  | -2.42663  | 2.22588  | -4.30892 |
| C  | -2.83859  | 1.50309  | -6.30246 |
| H  | -2.93393  | 2.50419  | -6.72413 |
| C  | -2.85415  | -0.89993 | -6.57343 |
| H  | -2.9617   | -1.78068 | -7.20732 |
| C  | -2.99133  | 0.37979  | -7.12318 |
| H  | -3.20817  | 0.50095  | -8.1848  |
| C  | -5.0125   | -0.67256 | 0.34659  |
| H  | -4.90657  | -0.80302 | 1.43193  |
| H  | -5.33755  | -1.63922 | -0.0641  |
| C  | -6.03696  | 0.43074  | 0.02966  |
| H  | -6.15927  | 0.52496  | -1.05756 |
| H  | -5.65785  | 1.39315  | 0.39894  |
| C  | -7.37215  | 0.11984  | 0.66737  |
| C  | -7.612    | 0.45096  | 2.00997  |
| H  | -6.83859  | 0.96696  | 2.58276  |
| C  | -8.38146  | -0.53401 | -0.05404 |
| H  | -8.2141   | -0.79208 | -1.10173 |
| C  | -9.60294  | -0.85166 | 0.55028  |
| H  | -10.37867 | -1.35607 | -0.02658 |
| C  | -8.83067  | 0.13564  | 2.61821  |
| H  | -9.00209  | 0.40479  | 3.66081  |
| C  | -9.83103  | -0.51867 | 1.88966  |
| H  | -10.78302 | -0.76292 | 2.36145  |

Complex 2, S0 (singlet ground state)

PBE1PBE/lanl2dzp/THF ( $C_1$ )

E = -1564.2994271 au

|    |           |           |           |
|----|-----------|-----------|-----------|
| Au | -0.459479 | 1.596153  | 0.034877  |
| Au | 0.459479  | -1.596153 | -0.034877 |
| P  | 1.238947  | 0.295527  | 2.699508  |
| S  | 1.123225  | 2.113058  | 1.698339  |
| S  | 2.091206  | -1.271239 | 1.630564  |
| P  | -1.238947 | -0.295527 | -2.699508 |
| S  | -1.123225 | -2.113058 | -1.698339 |
| S  | -2.091206 | 1.271239  | -1.630564 |
| C  | 0.414872  | 0.223535  | -3.326283 |
| C  | 1.126162  | -0.824972 | -4.194147 |
| H  | 1.008161  | 0.469072  | -2.432140 |
| H  | 0.249168  | 1.161886  | -3.878215 |
| H  | 1.271602  | -1.745157 | -3.600756 |
| H  | 0.496575  | -1.084338 | -5.064011 |
| C  | -2.348617 | -0.614907 | -4.135682 |
| C  | -2.504293 | 0.575025  | -5.097754 |
| H  | -3.319763 | -0.910198 | -3.710239 |
| H  | -1.936250 | -1.493866 | -4.654569 |
| H  | -2.899215 | 1.445600  | -4.544841 |
| H  | -1.516786 | 0.857274  | -5.504034 |
| C  | -0.414872 | -0.223535 | 3.326283  |
| C  | -1.126162 | 0.824972  | 4.194147  |
| H  | -0.249168 | -1.161886 | 3.878215  |
| H  | -1.008161 | -0.469072 | 2.432140  |
| H  | -0.496575 | 1.084338  | 5.064011  |
| H  | -1.271602 | 1.745157  | 3.600756  |
| C  | 2.348617  | 0.614907  | 4.135682  |
| C  | 2.504293  | -0.575025 | 5.097754  |
| H  | 1.936250  | 1.493866  | 4.654569  |
| H  | 3.319763  | 0.910198  | 3.710239  |
| H  | 1.516786  | -0.857274 | 5.504034  |
| H  | 2.899215  | -1.445600 | 4.544841  |
| C  | -3.438945 | 0.218284  | -6.232270 |
| C  | -2.942721 | -0.320919 | -7.430036 |
| C  | -4.826111 | 0.392144  | -6.096298 |
| C  | -3.810601 | -0.678842 | -8.469442 |
| H  | -1.863925 | -0.456882 | -7.553632 |
| C  | -5.697944 | 0.035690  | -7.132152 |
| H  | -5.226880 | 0.816869  | -5.170587 |
| C  | -5.192651 | -0.502229 | -8.323390 |
| H  | -3.406908 | -1.092785 | -9.397255 |
| H  | -6.774563 | 0.182220  | -7.011418 |
| H  | -5.871630 | -0.778083 | -9.134345 |

|   |           |           |           |
|---|-----------|-----------|-----------|
| C | 2.462095  | -0.298343 | -4.669576 |
| C | 2.606557  | 0.249660  | -5.953763 |
| C | 3.580214  | -0.322174 | -3.818882 |
| C | 3.838504  | 0.762521  | -6.381075 |
| H | 1.746826  | 0.271608  | -6.630359 |
| C | 4.812765  | 0.188783  | -4.240757 |
| H | 3.484936  | -0.749389 | -2.815234 |
| C | 4.946413  | 0.734587  | -5.525022 |
| H | 3.933839  | 1.181872  | -7.386193 |
| H | 5.672852  | 0.158359  | -3.566621 |
| H | 5.908931  | 1.132280  | -5.856861 |
| C | -2.462095 | 0.298343  | 4.669576  |
| C | -3.580214 | 0.322174  | 3.818882  |
| C | -2.606557 | -0.249660 | 5.953763  |
| C | -4.812765 | -0.188783 | 4.240757  |
| H | -3.484936 | 0.749389  | 2.815234  |
| C | -3.838504 | -0.762521 | 6.381075  |
| H | -1.746826 | -0.271608 | 6.630359  |
| C | -4.946413 | -0.734587 | 5.525022  |
| H | -5.672852 | -0.158359 | 3.566621  |
| H | -3.933839 | -1.181872 | 7.386193  |
| H | -5.908931 | -1.132280 | 5.856861  |
| C | 3.438945  | -0.218284 | 6.232270  |
| C | 4.826111  | -0.392144 | 6.096298  |
| C | 2.942721  | 0.320919  | 7.430036  |
| C | 5.697944  | -0.035690 | 7.132152  |
| H | 5.226880  | -0.816869 | 5.170587  |
| C | 3.810601  | 0.678842  | 8.469442  |
| H | 1.863925  | 0.456882  | 7.553632  |
| C | 5.192651  | 0.502229  | 8.323390  |
| H | 6.774563  | -0.182220 | 7.011418  |
| H | 3.406908  | 1.092785  | 9.397255  |
| H | 5.871630  | 0.778083  | 9.134345  |

Complex 2, T1 (UKS Optimized Triplet Excited State)

PBE1PBE/lanl2dzp/THF ( $C_1$ )

E = -1564.2994271 au

|    |                   |                  |                  |
|----|-------------------|------------------|------------------|
| Au | -0.0576464107942  | -0.4693334997847 | 1.3777295704203  |
| Au | 0.0289980514970   | 0.3177442260973  | -1.1514331867636 |
| P  | 3.1659794171329   | 0.3674262767357  | 0.3429687206399  |
| S  | 2.2813085404300   | 0.4355224801630  | 2.1974637793997  |
| S  | 2.1438848734072   | 1.4347023038911  | -1.1452159514514 |
| P  | -3.2022110348275  | -0.4204226497677 | -0.1509532410849 |
| S  | -2.0682972112349  | -0.5421354764776 | -1.9110150976159 |
| S  | -2.4701335008998  | -1.5482615153805 | 1.4025780620493  |
| C  | -3.3616671704012  | 1.3390874925313  | 0.3734108275279  |
| C  | -3.9436614132971  | 2.2775022365975  | -0.6942516888392 |
| H  | -2.3462403471496  | 1.6475614801909  | 0.6679223800396  |
| H  | -3.9796133890871  | 1.3314156948954  | 1.2848232259439  |
| H  | -3.3156556399124  | 2.2249298634443  | -1.6017892675389 |
| H  | -4.9595574863324  | 1.9454676368224  | -0.9728241626335 |
| C  | -4.8628678958197  | -1.0537442578693 | -0.6310885181862 |
| C  | -5.9184183666587  | -0.9482765746777 | 0.4833164283332  |
| H  | -4.7109382889111  | -2.1000743527242 | -0.9355226494830 |
| H  | -5.1684591591359  | -0.4888458412510 | -1.5258210352747 |
| H  | -5.5616860628408  | -1.4931101793262 | 1.3753588619830  |
| H  | -6.0521650994709  | 0.1100567683765  | 0.7700504718564  |
| C  | 3.3861493561685   | -1.3690085900236 | -0.2342267345589 |
| C  | 4.2039765290308   | -2.2518831655288 | 0.7212936069576  |
| H  | 3.8524400358871   | -1.3114195504251 | -1.2298691600717 |
| H  | 2.3668370965574   | -1.7643577732729 | -0.3666695377493 |
| H  | 5.2134904375123   | -1.8241390860981 | 0.8551326857478  |
| H  | 3.7124019277623   | -2.2638994251998 | 1.7103169734980  |
| C  | 4.8212035966450   | 1.1631995092779  | 0.4854056176147  |
| C  | 5.6585143516246   | 1.1396836042855  | -0.8055566310821 |
| H  | 5.3410794076333   | 0.6434706728614  | 1.3049973538859  |
| H  | 4.6321553695221   | 2.1944806839416  | 0.8192352830492  |
| H  | 5.8218934520316   | 0.0949864085385  | -1.1242460472796 |
| H  | 5.1051968814159   | 1.6520870422932  | -1.6125109856568 |
| C  | -7.2389065503264  | -1.5239098665952 | 0.0224765855736  |
| C  | -8.2048636754543  | -0.7095787686118 | -0.5905334085864 |
| C  | -7.5117265539356  | -2.8934343884520 | 0.1741638544211  |
| C  | -9.4156148004047  | -1.2491774955295 | -1.0428432552553 |
| H  | -8.0104861019308  | 0.3606842738825  | -0.7102102653296 |
| C  | -8.7205753591994  | -3.4376820202399 | -0.2759701084869 |
| H  | -6.7705404847232  | -3.5391640940756 | 0.6553738265341  |
| C  | -9.6774218428550  | -2.6166355041447 | -0.8875162434617 |
| H  | -10.1584584477255 | -0.5999494778010 | -1.5138513981382 |
| H  | -8.9185844705789  | -4.5048523179630 | -0.1452791368111 |

|   |                   |                  |                  |
|---|-------------------|------------------|------------------|
| H | -10.6230413152163 | -3.0392060935590 | -1.2368023988188 |
| C | -3.9958741434793  | 3.7012269603805  | -0.1861389780295 |
| C | -5.1928093398989  | 4.2523539518233  | 0.2971671913351  |
| C | -2.8352903411880  | 4.4936523694085  | -0.1681602831572 |
| C | -5.2324341979821  | 5.5640908297405  | 0.7883297148554  |
| H | -6.1066052747060  | 3.6506406373524  | 0.2853063257858  |
| C | -2.8694386115607  | 5.8040286795206  | 0.3211859838307  |
| H | -1.8944493501686  | 4.0802849270234  | -0.5462072786901 |
| C | -4.0699190138116  | 6.3446811201112  | 0.8028246009350  |
| H | -6.1744094802951  | 5.9784748886344  | 1.1573512193099  |
| H | -1.9575548764170  | 6.4070396068708  | 0.3235519212021  |
| H | -4.0989963492444  | 7.3690051542385  | 1.1831123821599  |
| C | 4.3140914865037   | -3.6608250942504 | 0.1825821623990  |
| C | 3.2631436361375   | -4.5761282001960 | 0.3625380644965  |
| C | 5.4509210268081   | -4.0747989472897 | -0.5293036253381 |
| C | 3.3454831521813   | -5.8731599767795 | -0.1563262093607 |
| H | 2.3718070422917   | -4.2699864604987 | 0.9196955367542  |
| C | 5.5386173832110   | -5.3724089310491 | -1.0504646513612 |
| H | 6.2803861059023   | -3.3759067098391 | -0.6737027441410 |
| C | 4.4848464710289   | -6.2763107836704 | -0.8665114015802 |
| H | 2.5199385926329   | -6.5732504932393 | -0.0029238277594 |
| H | 6.4333510283174   | -5.6792597652679 | -1.5986363004463 |
| H | 4.5519392883732   | -7.2899200444400 | -1.2700053123578 |
| C | 6.9916629898679   | 1.8188197375876  | -0.5858982224309 |
| C | 7.1198476806440   | 3.2085871692639  | -0.7445321997667 |
| C | 8.1191663879916   | 1.0798882430099  | -0.1927431723354 |
| C | 8.3450397106194   | 3.8461055772306  | -0.5154954436228 |
| H | 6.2512602881414   | 3.7967938101982  | -1.0568972109814 |
| C | 9.3471479011768   | 1.7129907756763  | 0.0378088137351  |
| H | 8.0376287616813   | -0.0046338463894 | -0.0714909178976 |
| C | 9.4640639888513   | 3.0997929273552  | -0.1222656407904 |
| H | 8.4283110447273   | 4.9279976497740  | -0.6485991731195 |
| H | 10.2160472250830  | 1.1217088549898  | 0.3387925691744  |
| H | 10.4221957219989  | 3.5954707109259  | 0.0538967539311  |

Complex 2, T1 (TDDFT Optimized Triplet Excited State)

PBE1PBE/lanl2dzp/THF ( $C_1$ )

Excited State 1: Triplet-?Sym 2.2644 eV 547.54 nm f=0.0000 <S\*\*2>=2.000  
 147 ->151 -0.10549  
 150 ->151 -0.68392

Total Energy, E(TD-HF/TD-KS) = -1564.25243747

79 0.188860 -0.781414 -0.120028

|    |          |           |           |
|----|----------|-----------|-----------|
| 16 | 2.408101 | 2.591598  | 0.156745  |
| 16 | 2.494351 | -0.832231 | -0.651164 |
| 15 | 3.307161 | 0.783002  | 0.413941  |
| 6  | 3.452662 | 0.336874  | 2.202393  |
| 1  | 3.936304 | -0.648920 | 2.247744  |
| 1  | 4.139771 | 1.073760  | 2.644681  |
| 6  | 2.126459 | 0.318996  | 2.973032  |
| 1  | 1.658183 | 1.309544  | 2.905016  |
| 1  | 1.437124 | -0.393057 | 2.499025  |
| 6  | 2.351320 | -0.064680 | 4.417066  |
| 6  | 2.628269 | 0.912677  | 5.384831  |
| 1  | 2.643221 | 1.965627  | 5.095333  |
| 6  | 2.319286 | -1.410370 | 4.812998  |
| 1  | 2.091830 | -2.181970 | 4.074096  |
| 6  | 2.560874 | -1.772939 | 6.141952  |
| 1  | 2.524993 | -2.823255 | 6.432848  |
| 6  | 2.870829 | 0.555624  | 6.715393  |
| 1  | 3.077722 | 1.329123  | 7.455667  |
| 6  | 2.839881 | -0.790050 | 7.098413  |
| 1  | 3.024388 | -1.070045 | 8.135837  |
| 6  | 5.033753 | 0.917720  | -0.226330 |
| 1  | 4.929246 | 1.208216  | -1.280165 |
| 1  | 5.497355 | 1.765879  | 0.296902  |
| 6  | 5.889112 | -0.353688 | -0.090124 |
| 1  | 6.016698 | -0.605303 | 0.971229  |
| 1  | 5.365004 | -1.195369 | -0.562688 |
| 6  | 7.243028 | -0.160231 | -0.734314 |
| 6  | 7.399644 | -0.324657 | -2.119434 |
| 1  | 6.542693 | -0.626885 | -2.725173 |
| 6  | 8.357929 | 0.218178  | 0.027422  |
| 1  | 8.255458 | 0.342823  | 1.107325  |



|    |           |           |           |
|----|-----------|-----------|-----------|
| 6  | 9.601551  | 0.429240  | -0.578587 |
| 1  | 10.459142 | 0.718652  | 0.029482  |
| 6  | 8.639748  | -0.114667 | -2.729462 |
| 1  | 8.744656  | -0.251440 | -3.806109 |
| 6  | 9.746137  | 0.264658  | -1.960149 |
| 1  | 10.714704 | 0.426182  | -2.433819 |
| 79 | -0.151110 | 1.834746  | 0.149111  |
| 16 | -2.007615 | -1.532567 | 0.342249  |
| 16 | -2.815140 | 1.906597  | 0.234438  |
| 15 | -3.258460 | 0.006448  | -0.347098 |
| 6  | -3.419856 | -0.112837 | -2.184150 |
| 1  | -4.205159 | 0.601125  | -2.470870 |
| 1  | -3.780899 | -1.127070 | -2.408669 |
| 6  | -2.129303 | 0.188796  | -2.956702 |
| 1  | -1.358427 | -0.539924 | -2.672791 |
| 1  | -1.758297 | 1.180125  | -2.663544 |
| 6  | -2.369652 | 0.134931  | -4.447416 |
| 6  | -2.220351 | -1.067621 | -5.154439 |
| 1  | -1.890257 | -1.963929 | -4.624673 |
| 6  | -2.778540 | 1.279274  | -5.148959 |
| 1  | -2.886230 | 2.225816  | -4.614880 |
| 6  | -3.036102 | 1.224017  | -6.522621 |
| 1  | -3.346704 | 2.124743  | -7.053018 |
| 6  | -2.476643 | -1.128531 | -6.528142 |
| 1  | -2.349356 | -2.070358 | -7.062779 |
| 6  | -2.887797 | 0.018081  | -7.217194 |
| 1  | -3.084088 | -0.025966 | -8.288750 |
| 6  | -4.896857 | -0.471233 | 0.356016  |
| 1  | -4.757862 | -0.453108 | 1.445185  |
| 1  | -5.082289 | -1.516338 | 0.067782  |
| 6  | -6.064973 | 0.439453  | -0.056311 |

|   |            |           |           |
|---|------------|-----------|-----------|
| 1 | -6.231811  | 0.364622  | -1.139369 |
| 1 | -5.797716  | 1.482211  | 0.161787  |
| 6 | -7.328895  | 0.062113  | 0.682263  |
| 6 | -7.578174  | 0.572101  | 1.965795  |
| 1 | -6.867722  | 1.270088  | 2.413560  |
| 6 | -8.257825  | -0.825669 | 0.120152  |
| 1 | -8.083232  | -1.225816 | -0.880739 |
| 6 | -9.409329  | -1.197554 | 0.822885  |
| 1 | -10.123593 | -1.885204 | 0.369049  |
| 6 | -8.727098  | 0.203562  | 2.671939  |
| 1 | -8.907552  | 0.613246  | 3.666171  |
| 6 | -9.647106  | -0.684598 | 2.102490  |
| 1 | -10.545089 | -0.970978 | 2.650420  |

**Figure S1: UV-Visible spectrum of complex 2 (2-MeTHF solvent)**

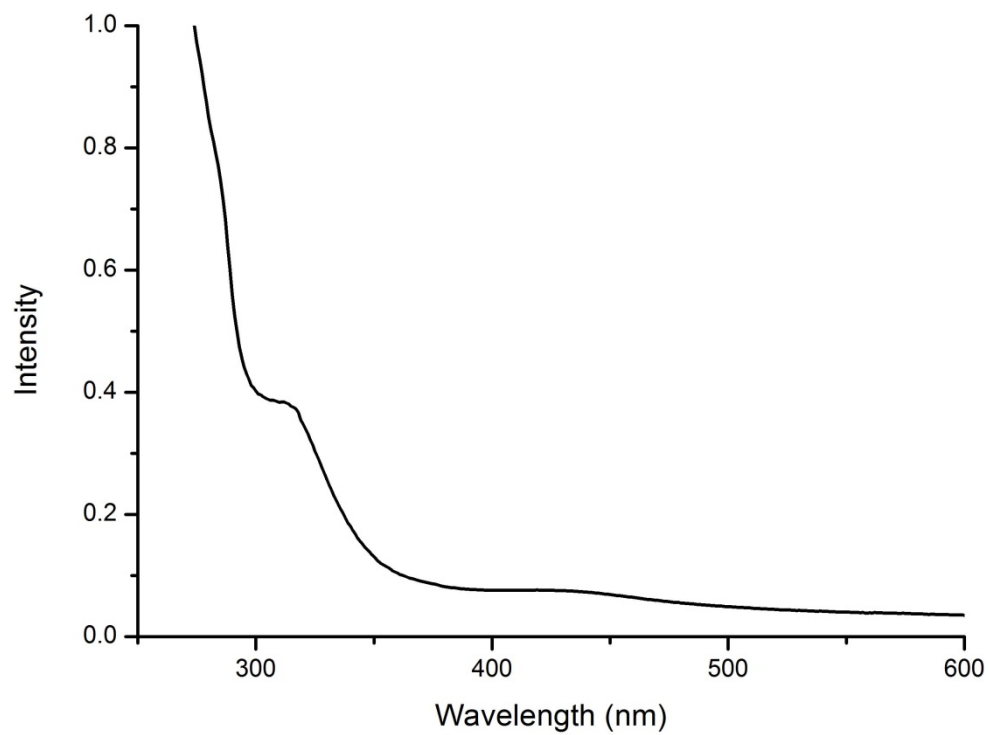

Supplement: c4cp03990d1.pdf [file c4cp03990d1.pdf]
